# Supplementary material for: Positive strand RNA viruses differ in the constraints they place on the folding of their negative strand
Source: RNA. 2022 Oct;28(10):1359–76. doi: 10.1261/rna.079125.122 (PMC9479745; doi:10.1261/rna.079125.122)
Supplement: Supplemental Material [file supp_079125.122_Supplemental_Table_S1.xlsx]

## Sheet: Sheet1
TABLE S1
Primer number	Primer name	Sequence (5'-3')
1	Ren_HdV(fwd)	CAAAGCGGCCGTCCCATTCGCCATTAC
2	HdV_2A(rev)	GCCAGCAAGCGGCCGGCATGGTCCCAGCC
3	T7	TAATACGACTCACTATAG
4	Ren_HdV(rev)	CGAATGGGACGGCCGCTTTGTTCATTTTTGAG
5	HdV_2A(fwd)	CATGCCGGCCGCTTGCTGGCAATCCACC
6	DVR4714-4694	GTATGAGTGTCGTACAGC
7	HdVko(fwd)	GACGGTCCGCTGGGGATGTTGCCCAGCCGGCGCC
8	HdVko(rev)	CAACATCCCCAGCGGACCGTCCCCTCGGTAATG
9	JFH92-110	GTATGAGTGTCGTACAGC
10	TSRV5’revflank	GCCGCTTTGTTCATTTTTGAG
11	TSRV3’fwdflank	TTGCTGGCAATCCACCC
12	DVR3511-3493	GTTCTGTCTCTGCCGGTC
13	TSRVko(fwd)	GGACTCAAGTGACCGGAAAGCACATCC
14	TSRVko(rev)	CTTTCCGGTCACTTGAGTCCGTGAGGACGAAAC
15	N79ko(fwd)	CGAAGCGCGTCTCGTCCTATTTGGGACTC
16	N79ko(rev)	CAAATAGGACGAGACGCGCTTCGGTGCGTCC
17	DVR6677-6694	CAACCTGAAGATCCCCTG
18	NS5ADVR_N79(rev)	CACTCATAGAGCAACAGACGGTAGTGTC
19	NS5ADVR_N79(fwd)	CGTCTGTTGCTCTATGAGTGGGGGCGGCGTGGATAGCAG
20	N79_NS5B(rev)	GTGGTATCATCCCCACCCCCACTGAGATGCA
21	N79_NS5B(fwd)	GTGGGGGTGGGGATGATACCACAGTTTGTTGTTC
22	DVR8867-8850	AACTGTTTCCCAGGCAGC
23	AscI-Renilla(fwd)	CGCTGGGCGCGCCATGACTTCGAAAGTTTATGATC
24	VP1N79(rev)	CCAACAGTTGTTAGATTTGTCCCACCCCCACTGAGATGC
25	VP1N79(fwd)	GGACAAATCTAACAACTGTTGGGCCTAGTGACATGTATGTG
26	HRVA16(4053-4033)	TTGAGTTTCTTAAGTTCACTC
27	NotI-T7-5UTRYFV	GCGGCCGCTAATACGACTCACTATAGAGTAAATCCTGTGTGCTAATTG
28	YFVcapsid-Renilla(rev)	CGAAGTCATGCGAACTCCTCGTCGTACC
29	FMDV2A-YFVenv(fwd)	CCCCGGTCCGGTTGGCATCAACACAAGAAAC
30	NS1internal(rev)	TTCCGTTCACCGCTGCACC
31	YFVcapsid-Renilla(fwd)	GAGGAGTTCGCATGACTTCGAAAGTTTATGA
32	FMDV2A-YFVenv(rev)	GTTGATGCCAACCGGACCGGGGTTGGACTC
33	AvrII-deltaRen_N79(fwd)	CAGCTACCTAGGCCACCATGGAGCGAGTTCTCAAAAATGAAC
34	FF_FMDV2A(rev)	GGCGCTGGGCCCTTCTTAATGTTTTTGGCATCTTCCATCGGACCGGGGTTGGACTCG
35	HEV_nLuc_Fwd	CGCGACCATGAACTCCTTCTCCACAAGCGCC
36	HEV_nLuc_Rvs	GGAGTTCATGGTCGCGAACCCATGGG
37	HEV_2746_2769	GGGGACGAGTTGTACCTTCC
38	HEV_5108_5089	CATGGGCGCAGCAAAAGAC
39	EcoRI_extN79(fwd)	TAATAGGAATTCTGAGCGAGTTCTCAAAAATG
40	EcoRI_extN79(rev)	GTTATTGAATTCTCTGGCTTCAGTTGGGTG
41	HEV_RdRP_GNN_fwd	AAAGGTAATAACTCGATAGTGCTTTG
42	HEV_3’UTR_rvs	CAGGGAGCGCGAAACGCAG
43	HEV_RdRp_GNN_rvs	TATCGAGTTATTACCTTTAAAGGCAGC
44	HEV_3453_3473	ACAGGGCGCTACCTACACAG
45	NotI_Ren(fwd)	ACAATTGGCGGCCGCTATCATAACCATGACTTCGAAAGTTTATGATCC
46	gt1bNS3_2A(rev)	GTAATAGGCGCCGGACCGGGGTTGGACTCGAC
47	2A_gt1bNS3(fwd)	CCCCGGTCCGGCGCCTATTACGGCCTACTC
48	gt1b3flank	CTCGGTGGAGGGCATCTC
49	FCV (5247-5264)	CGCGGTCTGACCAGATCG
50	FCV MCS(rev)	TGCAGTCCGGAGGTGGTACCGTTTAAACACCAGTGCATTGGAGGGACAAC
51	FCV MCS(fwd)	GGTACCACCTCCGGACTGCAGAATGAGGCTGGAAAGATATTCC
52	FCV (6247-6228)	CTGTAACAATACACCCAGAG
53	XbaI_MfeI_5UTR(fwd)	TTAAGGTCTAGACAATTGACCTGCCCCTAATAGGGGCGACACT
54	UTR/FMDV fusion(1)	CTGAAGCCAGATGGTGCACGGTCTACGAGAC
55	UTR/FMDV fusion(2)	CCGTGCACCATCTGGCTTCAGTTGGGTG
56	T7_inner_Ren(fwd)	GAATTCTAATACGACTCACTATAGGCACCTGATGAAATGGG
57	5’SGR	GCGACACGGAAATGTTGAATACTC
58	Xba_innerRen(fwd)	TTAAGGTCTAGAGCACCTGATGAAATGGG
59	Renprobeouter(fwd)	CGAAAGGCCTTGTGGTACTGCCTGATAG
60	Renprobeouter(rev)	TTTTCTGTTTGTGTCTGGCTTCAGTTGG
61	Renprobeinner(fwd)	CGGGAGGTCTCGTAGAC
62	Renprobeinner(rev)	TAATGGCGAATGGGACG
Ultra oligos		Sequence (5'-3')
N79		CTCAAAAATGAACAAAGCGGCGGGGGCGGCGTGGATAGCAGTGGAATCCAGGACGCACCGAAGCGCGTTTCGTCCTATTTGGGACTCATCAGCTGGATGTACCTGCATCTCAGTGGGGGTGGGTTGCTGGCAATCCACCCAAC
TSRV		CTCAAAAATGAACAAAGCGGCTCTTCTTCTTCCTGTTTCGTCCTCACGGACTCATCAGACCGGAAAGCACATCCGGTGACAGGGTCTTCTTCTTTGCTGGCAATCCACCCAAC
Gblocks		Sequence (5'-3')
Nanoluc_antisense_sTSRV		GTCCCTCCAATGCACTGGTGTTTAAACGGTACCATGGTCTTCACACTCGAAGATTTCGTTGGGGACTGGCGACAGACAGCCGGCTACAACCTGGACCAAGTCCTTGAACAGGGAGGTGTGTCCAGTTTGTTTCAGAATCTCGGGGTGTCCGTAACTCCGATCCAAAGGATTGTCCTGAGCGGTGAAAATGGGCTGAAGATCGACATCCATGTCATCATCCCGTATGAAGGTCTGAGCGGCGACCAAATGGGCCAGATCGAAAAAATTTTTAAGGTGGTGTACCCTGTGGATGATCATCACTTTAAGGTGATCCTGCACTATGGCACACTGGTAATCGACGGGGTTACGCCGAACATGATCGACTATTTCGGACGGCCGTATGAAGGCATCGCCGTGTTC…
Nanoluc_antisense_N79		GTCCCTCCAATGCACTGGTGTTTAAACGGTACCATGGTCTTCACACTCGAAGATTTCGTTGGGGACTGGCGACAGACAGCCGGCTACAACCTGGACCAAGTCCTTGAACAGGGAGGTGTGTCCAGTTTGTTTCAGAATCTCGGGGTGTCCGTAACTCCGATCCAAAGGATTGTCCTGAGCGGTGAAAATGGGCTGAAGATCGACATCCATGTCATCATCCCGTATGAAGGTCTGAGCGGCGACCAAATGGGCCAGATCGAAAAAATTTTTAAGGTGGTGTACCCTGTGGATGATCATCACTTTAAGGTGATCCTGCACTATGGCACACTGGTAATCGACGGGGTTACGCCGAACATGATCGACTATTTCGGACGGCCGTATGAAGGCATCGCCGTGTTC…
